# Supplementary material for: The Sequential Action of MIDA9/PP2C.D1, PP2C.D2, and PP2C.D5 Is Necessary to Form and Maintain the Hook After Germination in the Dark
Source: Frontiers journal article supplement (doi:10.3389/fpls.2021.636098), 2021-03-09
Supplement: Data_Sheet_2.PDF [file Data_Sheet_2.PDF]

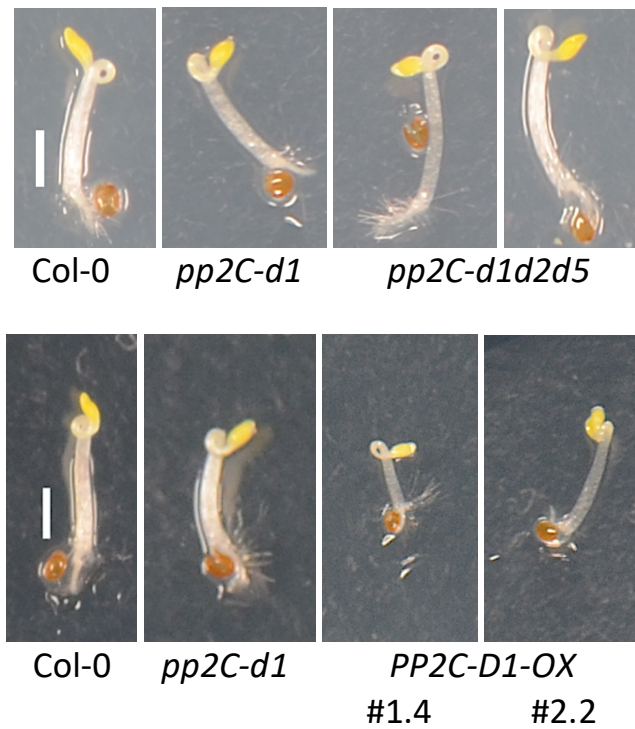

**Supplementary Figure S1. ACC-induced hook curvature in PP2C.D mutants.** Visual phenotypes of 3-day-old (Top) and 4-day-old (Bottom) etiolated Col-0, *pp2c-d1*, *pp2c-d1d2d5* and *PP2C-D1-OX* seedlings grown in the dark on MS medium containing 2  $\mu$ M ACC. Bar = 1 mm.
